# Supplementary material for: The differential diagnostic role of complete blood cell count parameters in patients with bacterial pneumonia from non-bacterial pneumonia
Source: Research Square preprint supplement (doi:10.21203/rs.3.rs-7971696/v1), 2025-12-15
Supplement: Supplementary file 1 [file 85f26a407dcd4705b65ef5e5.docx]

**The differential diagnostic role of complete blood cell count parameters in patients with bacterial pneumonia from non-bacterial pneumonia**

**Yalweayker Eyayu1,*****, Yemataw Gelaw1, Aregawi Yalew1, Sintayehu Admas1, Nigusie Alemu1, Abebe Birhanu**2**, Mitkie Tigabie**2**, Lyusera Marelgn3, Dereje Mengesha Berta1**

**Affiliations**

1Department of Hematology and Immunohematology, School of Biomedical and Laboratory Sciences, College of Medicine and Health Sciences, University of Gondar ,P.O. Box 196, Gondar, Ethiopia

2Department of **Microbiology,** School of Biomedical and Laboratory Sciences, College of Medicine and Health Sciences, University of Gondar, P.O. Box 196, Gondar, Ethiopia

3Department of Medical Laboratory Science, College of Health Science, MizanTepi University, MizanTepi, Ethiopia.

**Corresponding Author:** yalweeyayu@gmail.com
